# Supplementary material for: Analysing a Group of Homologous BAHD Enzymes Provides Insights into the Evolutionary Transition of Rosmarinic Acid Synthases from Hydroxycinnamoyl-CoA:Shikimate/Quinate Hydroxycinnamoyl Transferases
Source: MDPI journal article supplement (doi:10.3390/plants13040512), 2024-02-13
Supplement: s1 [file s1]

**Revealing a Cluster of Homologous Proteins Provides New Insights Into the Evolutionary  
Transition from hydroxycinnamoyl-CoA: shikimate/quinate hydroxycinnamoyl transferase to  
rosmarinic acid synthase**

Jiali Zhou<sup>1</sup>, Xiaofang Zou<sup>1</sup>, Zixin Deng<sup>1</sup>, Lian Duan<sup>1\*</sup>

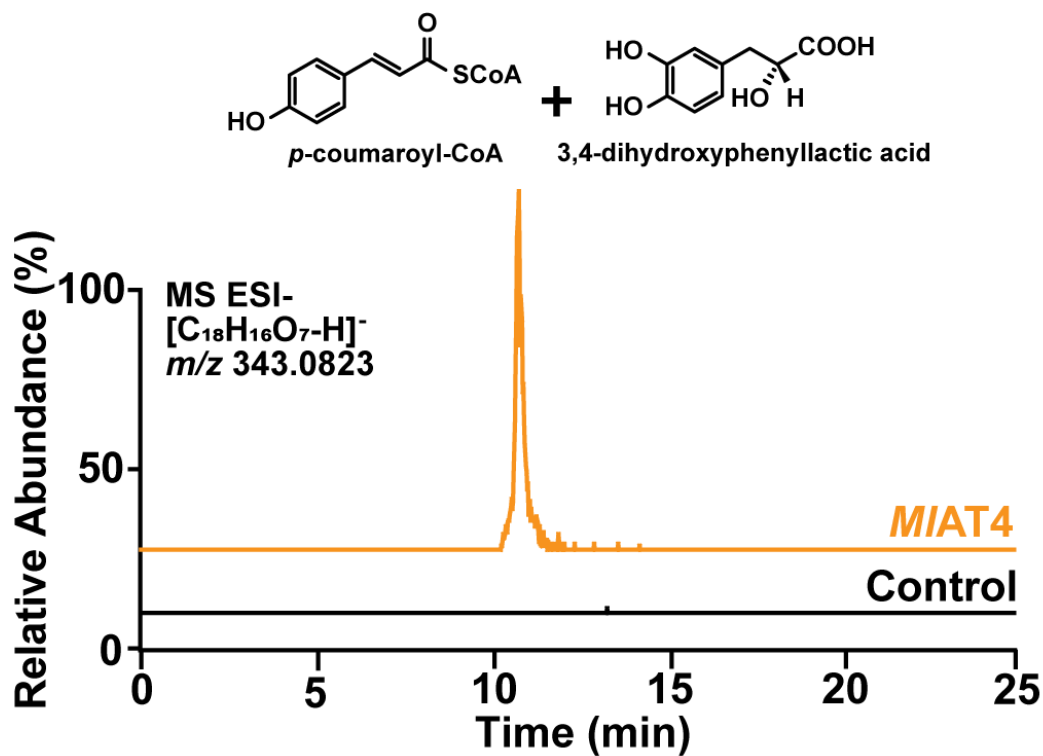

**Figure S1. *MIAT4* has RAS catalytic potential.** *MIAT4* has the ability to catalyze the production of a small quantity of *p*-coumaroyl-3', 4'-dihydroxyphenyllactate or its isomer by converting *p*-coumaroyl-CoA and salvianolic acid A (3,4-dihydroxyphenyllactic acid). The product was identified through mass spectrometry, with molecular ion peaks extracted while operating in negative ion mode.

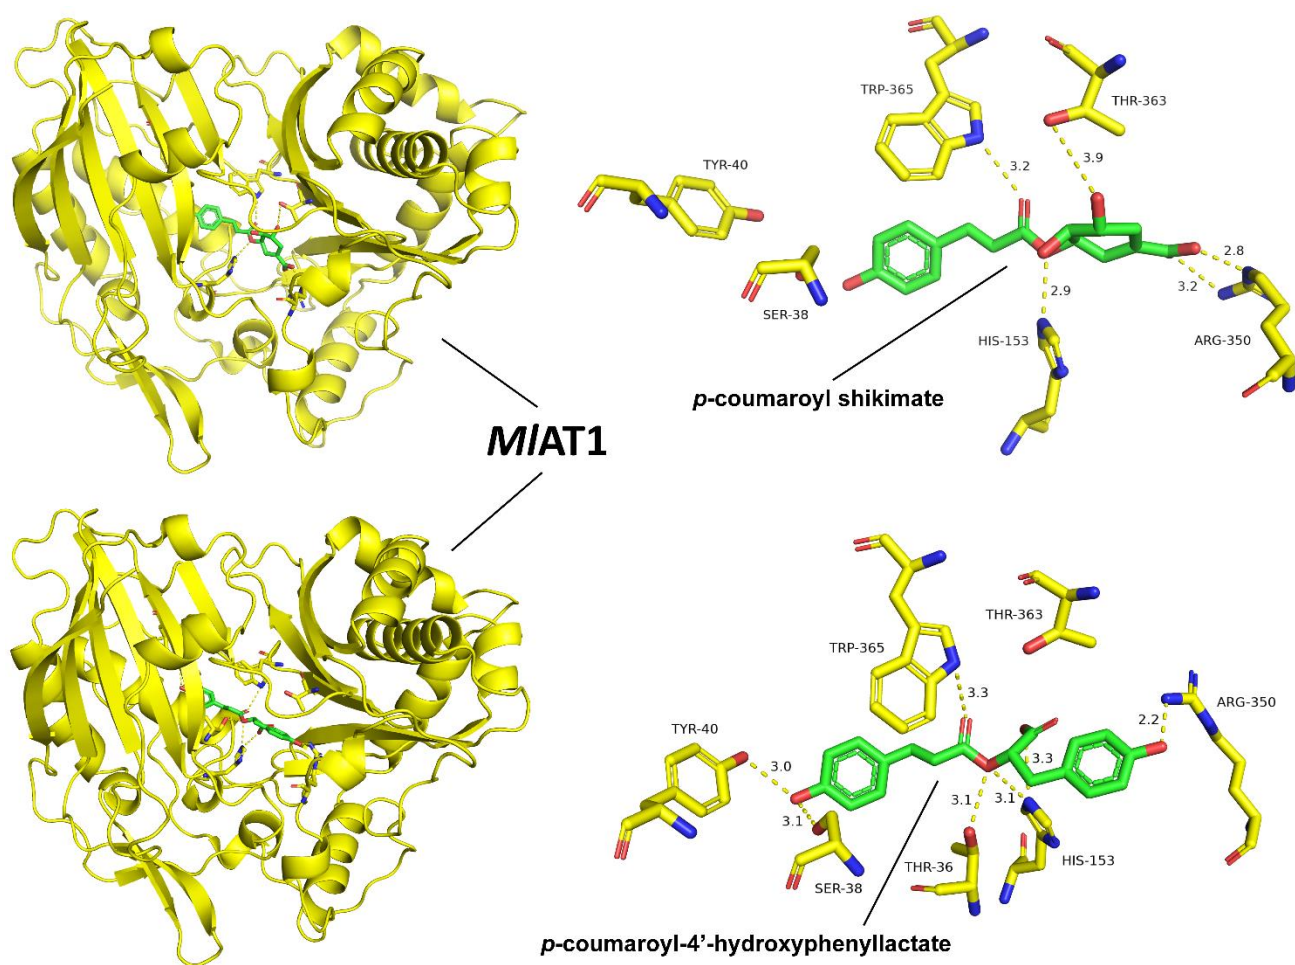

**Figure S2. The homology model of *MIAT1*.** The binding mode between the enzyme and *p*-coumaroyl shikimate resembles that observed in other HCTs. Additionally, active residues in its catalytic cavity might non-specifically guide the binding of 4-hydroxyphenyllactate, resulting in promiscuous activity. Thr-36, Arg-350, and Thr-363 may all potentially provide binding sites for the 4-hydroxyphenyllactate molecule. Ligand molecules are labeled in green, and residues are displayed in yellow.

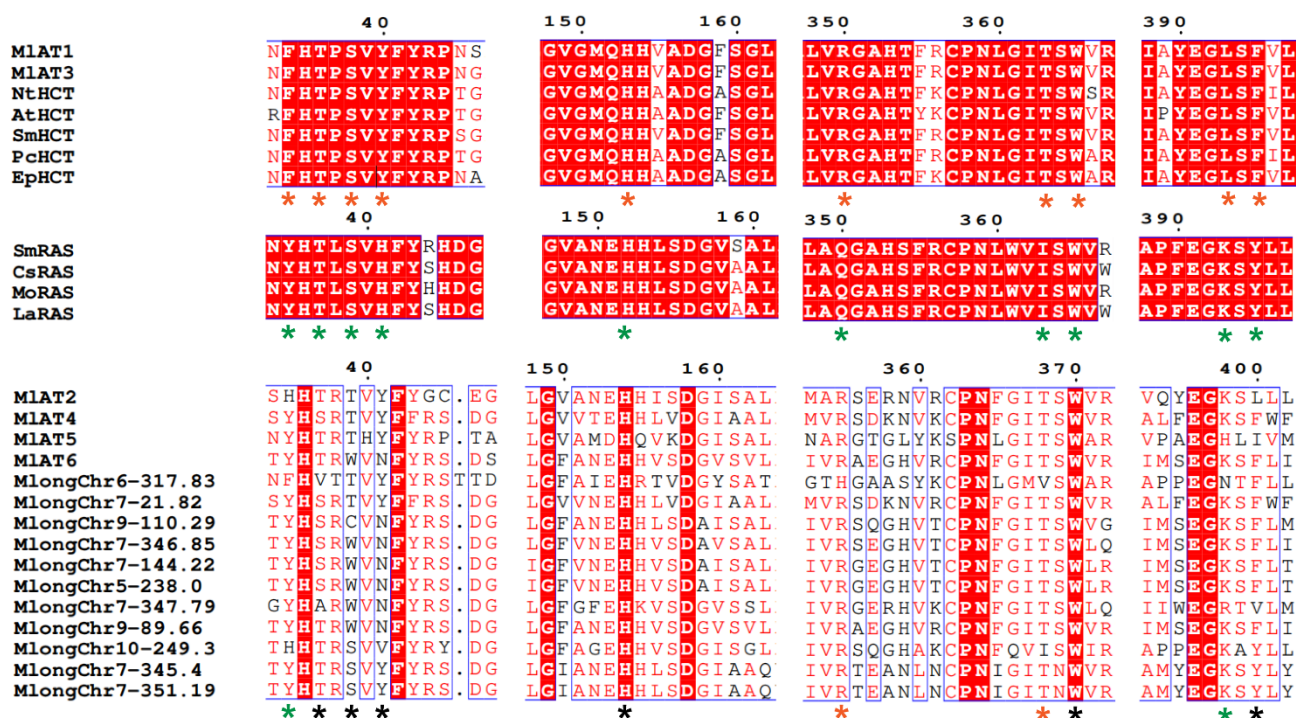

**Figure S3. The multiple sequence alignment of HCTs, RAS-homo proteins in *Menta longifolia*, and Lamiaceae RASs.** Active residues in the catalytic pocket were indicated by asterisks. Orange asterisks denote active residues conserved in HCT, while green asterisks represent active residues conserved in RAS. The residues associated with acyl acceptor binding in RAS-homo exhibit significant dual characteristics of both HCT and RAS.

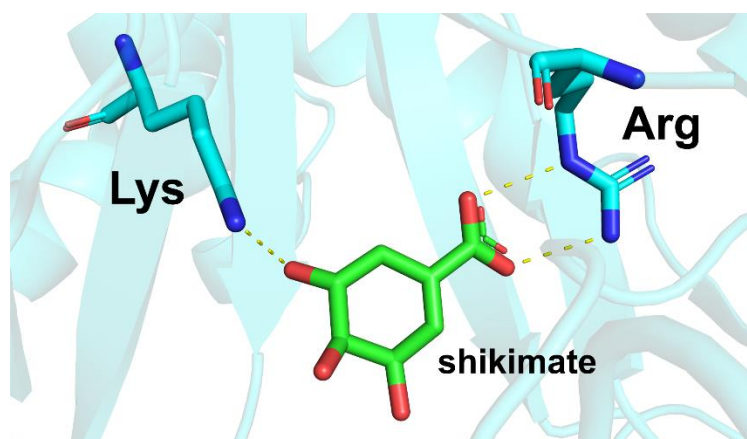

| <i>p</i> -coumaroyl shikimates |      |
|--------------------------------|------|
| <i>MIAT6</i>                   | 100% |
| <b>R355A</b>                   | 0%   |
| <b>K398L</b>                   | 0%   |
| <b>R355A+K398L</b>             | 0%   |

**Figure S4. Validation of two key active residues.** Mutation of either of two active residues (the arginine residue Arg-355 and the lysine residue Lys-398) in *MIAT6* results in complete deactivation of the enzyme. These two residues potentially influenced enzyme activity by participating in shikimate binding.

**Table S1. Enzymes used for the phylogenetic tree.**

| Enzyme  | Species                                        | ACCESSION  | Enzyme | Species                             | ACCESSION  |
|---------|------------------------------------------------|------------|--------|-------------------------------------|------------|
| NtHCT   | <i>Nicotiana tabacum</i>                       | Q8GSM7     | NtHQT  | <i>Nicotiana tabacum</i>            | CAE46932.1 |
| ArHCT1  | <i>Actaea racemosa</i>                         | D4NUX0     | NtTHT  | <i>Nicotiana tabacum</i>            | P80969     |
| AsHHT1  | <i>Avena sativa</i>                            | Q7XXP3     | OsAHT1 | <i>Oryza sativa</i> Japonica Group  | Q7XPK7     |
| AsHHT4  | <i>Avena sativa</i>                            | A0A4Y5UJ70 | OsHCT1 | <i>Oryza sativa</i> subsp. japonica | Q0JBZ8     |
| AtHCT   | <i>Arabidopsis thaliana</i>                    | Q9FI78     | OsHCT2 | <i>Oryza sativa</i> subsp. japonica | Q6K638     |
| AtSHT   | <i>Arabidopsis thaliana</i>                    | O64470     | OsHCT4 | <i>Oryza sativa</i> subsp. japonica | Q5SMM6     |
| CcHCT   | <i>Coffea canephora</i>                        | ABO47805.1 | OsPHT1 | <i>Oryza sativa</i> subsp. japonica | Q5SMM8     |
| CcHQT   | <i>Cynara cardunculus</i> var. <i>scolymus</i> | CAM84302.2 | OsSHT1 | <i>Oryza sativa</i> Japonica Group  | Q2QRK9.1   |
| CiHCT   | <i>Cichorium intybus</i>                       | ANN12609.1 | OsSHT2 | <i>Oryza sativa</i> Japonica Group  | Q0ING3.1   |
| CkHCT   | <i>Caragana korshinskii</i>                    | AHK05938.1 | OsTBT1 | <i>Oryza sativa</i> Japonica Group  | Q2R0K3.1   |
| CsHCT   | <i>Coleus scutellarioides</i>                  | CBI83579.1 | OsTHT1 | <i>Oryza sativa</i> Japonica Group  | Q338X7.1   |
| CsRAS   | <i>Coleus scutellarioides</i>                  | A0PDV5.1   | PcHCT  | <i>Phacelia campanularia</i>        | QDF44405.1 |
| DcHCBT1 | <i>Dianthus caryophyllus</i>                   | O24645     | PcRAS  | <i>Phacelia campanularia</i>        | QDF44407.1 |
| EpHCT   | <i>Echinacea purpurea</i>                      | AXY97959.1 | PvHCT2 | <i>Panicum virgatum</i>             | 5FAL       |
| EpHQT   | <i>Echinacea purpurea</i>                      | QRI59127.1 | SbHCT  | <i>Sorghum bicolor</i>              | 4KEC_A     |
| EsHCT   | <i>Eleutherococcus senticosus</i>              | UWM25202.1 | SIHQT  | <i>Solanum lycopersicum</i>         | CAE46933.1 |
| LaRAS   | <i>Lavandula angustifolia</i>                  | AEA36976.1 | SmHCT  | <i>Salvia miltiorrhiza</i>          | ACA64049.1 |
| LjHQT   | <i>Lonicera japonica</i>                       | ACZ52698.1 | SmRAS  | <i>Salvia miltiorrhiza</i>          | ADA60182.1 |
| MoRAS   | <i>Melissa officinalis</i>                     | G0LD36     | SnHCT  | <i>Solanum nigrum</i>               | QIC52996.1 |
| NpHCT   | <i>Narcissus pseudonarcissus</i>               | A0A2H5AIZ1 |        |                                     |            |

**Table S2. PCR primers used for protein expression.**

[illegible]

**Information S1. The CDS sequences of *MIAT1-MIAT7*.**

**>MIAT1**

ATGAAGATCGAGGTGAGAGACTCGACGCTGGTGCGGCCGTCGGCGGCGACGCCGGCGGTCAGCC  
TGTGGAATTCGAACGTTGACTTGGTGGTGCCTAACTTCCACACCCCGAGCGTCTACTTCTACCGCC  
CCAACAGCGCCCGCAGAGTTCTTCGACACGGCGGTGATGAAGGCGGCGCTCGGCCGCGCGCTGGT  
GCCGTTCTACCCCATGGCGGGGAGGCTGAAGAGAGACGAAGACGGAAGGATCGAGATCGACTGCA  
ACGCCGAGGGAGTGCTCTTTGTGGAGGCGGAGTCCGACGGCACGGTCGACGATTACGGCGATTTC  
GCCCCCACTCTGGAGCTCCGTCGCCTCATTCCGGCGGTGGATTATTCGCAGGGAATCTCGGCCTA  
CGCGCTTCTCGTGTTGCAGGTTACATTTTTCAAATGTGGTGGAGTATCCCTAGGCGTCGGTATGCAA  
CACCACGTGGCTGACGGATTTTCCGGGCTCCACTTCATCAACGCGTGGTCCGACATGGCTCGTGG  
GCTCGACATCACCTCCCACCATTCATCGACCGGACCCTTCTCCGTGCCCGCGATCCCCCGCAGC  
CGCAATTCAAGCATGTCGAGTACCAACCCCTCCCTCCATGAAAACCTTATGACGCAACGGAGACCG  
TAGTCTCGATATTCAAGCTTACTCGCGAGCAACTCACCCTCTCAAAGCCAAGTCCAAGGACGACG  
GCAATACGGTCAACTACAGCTCCTACGAGATGCTCTCGGGCCACGTCTGGCGCTGCGCCTGCCTG  
GCCCGCGGCGCTGCCCGAGGATCAGGACACGAAGCTGTACATCGCGACGGACGGGAGGTCCCGGC  
TTCAGCCCCCGCTCCCGCCGGGCTACTTCGGGAACGTGATCTTCACGGCCACGCCGTGGCCGTG  
GCCGGGGACCTGGAGTCGAGGCCTGTCTGGTACGGCGCCAGCAAGATCCACGATGCGCTGGCCC  
GGATGGACAATGAGTACCTGAGGTGGGCCCTCGACTACCTGGAGCTCCAGCCGGACCTCAAGGCG  
CTTGTCCGCGGGGCCACACGTTTAGGTGCCCGAACCTTGGGATCACGAGCTGGGTGCGGCTCCC  
GATCCACGACGCGGATTTTGGGTGGGGGAGGCCCATCTTCATGGGGCCCGGGGGCATAGCGTAC  
GAGGGTTTGAGCTTCGTGCTGCCGAGCCCGGCCAATGACGGAAGCCTGTGCGTTGCGATTTCCCT  
TCAAGCAGAGCACATGAAGGTTTTTGAGAAGCTGCTCTATGAAATTTGA

**>MIAT2**

ATGAAGATCAGTGCGAAAGAGTCGACGATGGTGAGGCCAACGACAGAGACGCCAGGTGGCAGTCT  
GTGGCTGTGCAATTTGACTTACTAATGCCGGCTTCCACCCACACCCGCACCGTCTACTTCTACGG  
CTGCGAAGGTGCCGCCAATTCTTCGACACAGCGGTGCTGAAGGAGGCGCTAGGGCGGGCCCTG  
GTTGAGTTCTACCCTTATGCAGGGAGGCTGAGGAAGGCGGGCGACGGCCGCATCGAGATCGACTG  
CAACGGAGAAGGAGTGTTGTTTGTGGAGGCGGAGTGCGATGGCGCCATCGACGATTTGGGCGGGT  
TCGGACCCCGGTGCCCCGATCTCACTCTTGTGCCGAAAGTTGACTATTCTCAGGGAATTTCCACTTT  
CCCCTTCTTTTGTGCTGCAGCTTACTCGCTTCAAATGCGGCGGGCGTTTGCCTCGGCGTTGCAAATGA  
GCATCACATTTCCGACGGGATCTCCGCCCTCCATTTTCATCAACACATGGTCTGACCTCTCCCGCGG  
CCTAACCCACCGCGGTGCCCGCGTTCTCGACCGCCGCGCTCCTCTCCTCCCGCCACCCGCCGCACC  
CGCAATTCACCCACACCGAGCATCACCCGCCGCGCGCTGAAAACCCCTCTCCTGATCAGCTCCT  
CTTACGCGACACAATCAACCTTACCCTCACCCCGACCCACCTCAACCTCCTCAAACAAAAATGCGA  
CCAAAACAAATCCGACCGCACGTACACCACGTACGAGGCGGTGCGCGGCCACGTGTGGCGCTGCG  
CCACGATAGCCCGCAGCCTCCCCACGACCAGGAAACCAAGCTCCAGATCCCGGTGACGCGCGT  
ACCCGCCTCCGGCCACCGCTTCCGCCGGGATTCTTCGGCAACGGGATCTTCTACACGTCGTCGAC  
CGCGCTCTGCGGCGAGCTCGCGTCGAAACCCCTGGAATTCGCCGTGCGGAAAGTCAACGCGGCG  
CTGGTCAAGATGGACGACGAGTACCTGAGGTGAGCGGTGACTATCTGGAGCTGCAACTGCCGCG  
TATCTACGAGATGGCGCGCAGCGAGAGGAACGTAAGGTGTCCGAATTTGCGGATAACGAGCTGGG  
TCCGGCTGCCGTTCTACGAAGCGGATTTCCGGTGGGGAAAACCGGTTTATGCTGGACCGGCTGCG  
GTTCAGTATGAAGGGGAAGAGTTTGTGCTGGTTGATAGGGAAAATGAAGGAGGCTTGGTGCTTGTG  
ATCACGCTGCTTAAGCCGCATATGGAGGTTTTTGAGAAGTTGCTCTATGATATT



>MIAT3

ATGAAGATCGAGGTGAGAGACTCGACGCTGGTGCGGCCGTCGGCGGCGACGCCGGCGGTTCAGCC  
TGTGGAATTCGAACGTTGACTTGGTGGTGCCTAACTTCCACACCCCGAGCGTCTACTTCTACCGCC  
CCAACAGCGCCGCAGAGTTCTTCGACACGGCGGTGATGAAGGCGGCGCTCGGCCGCGCGCTGGT  
GCCGTTCTACCCCATGGCGGGGAGGCTGAAGAGAGACGAAGACGGAAGGATCGAGATCGACTGCA  
ACGCCGAGGGAGTGCTCTTTGTGGAGGCGGAGTCCGACGGCACGGTCGACGATTACGGCGATTTC  
GCCCCACTCTGGAGCTCCGTCGCCTCATTCCGGCGGTGGATTATTCGCAGGGAATCTCGGCCTA  
CGCGCTTCTCGTGTTGCAGGTTACATTTTTCAAATGTGGTGGAGTATCCCTAGGCGTCGGTATGCAA  
CACCACGTGGCTGACGATTTTCCGGGCTCCACTTCATCAACGCGTGGTCCGACATGGCTCGTGG  
GCTCGACATCACCTCCCACCATTCATCGACCGGACCCTTCTCCGTGCCCGCGATCCCCCGCAGC  
CGCAATTCAAGCATGTCGAGTACCAACCCCTCCCTCCATGAAAATTATGACGCAACGGAGACCG  
TAGTCTCGATATTCAAGCTTACTCGCGAGCAACTCACCACTCTCAAAGCCAAGTCCAAGGACGACG  
GCAATACGGTCAACTACAGCTCCTACGAGATGCTCTCGGGCCACGTCTGGCGCTGCGCCTGCCTG  
GCCGCGGCGCTGCCCGAGGATCAGGACACGAAGCTGTACATCGCGACGGACGGGAGGTCCCGGC  
TTCAGCCCCCGCTCCCGCCGGGCTACTTCGGGAACGTGATCTTCACGGCCACGCCCGTGGCCGTG  
GCCGGGGACCTGGAGTCGAGGCCTGTCTGGTACGGCGCCAGCAAGATCCACGATGCGCTGGCCC  
GGATGGACAATGAGTACCTGAGGTCCGCCCTCGACTACCTGGAGCTCCAGCCGGACCTCAAGGCG  
CTTGTCCGCGGGGGCCACACGTTTAGGTGCCCGAACCTTGGGATCACGAGCTGGGTGCGGCTCCC  
GATCCACGACGCGGATTTTGGGTGGGGGAGGCCCATCTTCATGGGGCCCGGGGGCATAGCGTAC  
GAGGGTTTGAGCTTCGTGCTGCCGAGCCCGGCCAATGACGGAAGCCTGTGCGTTGCGATTTCCCT  
TCAAGCAGAGCACATGAAGGTTTTTGAGAAGCTGCTCTATGAAATTTGA

>MIAT4

ATGTGTAGCATGAAGATCAGTGTGAAGAAGACGACGGTGGTGAAGCCGATGGAAGAGACGCCGAG  
CGGCGCTCTGTGGCTGTCGAGCTTGGACTTACTACTGCCTGCATCCTACCACTCCCGCACCGTCTA  
CTTCTTCCGCTCCGATGGCTCCCCCGGCTTCTTCGACGCGGCGGCGCTCATGGCGGCGCTCAGCC  
GGAATCTGGTTGAGTTCTACCCCTTTGCTGGGAGACTGAGGAGGGACGACAACGGCCGCCTCGAG  
ATCAACTGCAACGGCGAAGGGGCGCTGTTTCGTGGAGGCGGAGTGCGACGGCACGTTGGATGATAT  
GGGTGATTTACGCCCTAGGGCTGACGTCAAGTTCGTTCCCAAAGTGGACTATTCTCATGGAATCTC  
CAGCTTCCCCTTTCTTGATGCAGTTAACTCGCTTCAAGTGCGGTGGGGTCTGCTTAGGTGTTGTG  
ACCGAGCACCACTCGTAGATGGGATCGCCGCTCTCCACTACATCAACACGTGGGCCCCGATCGC  
CCTCGGCGACAGGAACGCCGCCGCCGCGGACCCTCCGTTCTTGACCGCCGCCTCCTCCTCCT  
CCCGCCGGCCCCCGCAGCCAAAGTTCCCCACACCGAGCACCAAGCCTTTCCCTTCGCTCAAGGCC  
CCACTAAACATCTCCGACGACACGTCAATTCAAGATCCTCGCCCTCACCGGCAACCACCTCACCGCC  
CTCAAGCAAGCATGCAACGGGAAGAAGGATCGGAGCTACACCACGTACGAGGCGGCGGCGGGCC  
ACGTGTGGCGCTGCGTTTGCATGGCCCCGCGGCCTGCCCTCCGATCAGGAGTCCAGGCTCCAGCTG  
CCGGTTGACGGCCGGTCGCGGCTGCGGCCGCCGCTCCCGCCGCGTTACTTCGGCAACGGGATCT  
TCTACACAACGTCGACCGTCACGTGCGGAGAGCTGGCCTCAAACCCGCTGGAGTACGCGGCCGGG  
AAAGTGCGGGAGGCGGTGGCGCGGATGGACGACGAGTACTTGAGGTGCGCGGTGGACTACGTGG  
AGATGAAGCTGCCGGAGTCCGACAGCATGGTGCGGAGTGATAAGAACGTGAAGTGTCCGAACCTC  
GGGATAACGAGCTGGGTCCGGCTGCCGTTCTACGAGGCGGATTTGCGGTGGGGAAAACCGGTTTA  
TGCCGGACCGGCTGCGGCTTTGTTTGAAGGGAAAAGCTTTTGGTTTGTGATCCTAAAAAGGAAGG  
AGACACATTGCTTGCGATCACGTTGCTTAAACCGCATATGGAGCTATTTGAGAAGTTACTCTATGATT  
TTTGA

>MIAT5

AACACATAACACGTACTACTACTCATTCTACTATTTCATCACCAAGGACCTTCGACGATGAAGATTAC  
GGTGAAGGAGTCGGCGGTGGTGAAGCCAACCTCCGGCGAAGCCGCGGACGACCATATGGATCTCC  
AATCTCGACGCCATTTTGCCGGAGAACTACCACACTCGCACCCACTACTTCTACCGCCCAACCGCC  
GCCGCCGACTTCTTCGACGCGGCGGTGCTCACGTGCGCGCTCGCTCGGACTCTCTCCGAGTTCTA  
CCCCGTGGCCGGGAGGCTGAAGAAGGACGGTAACGGCCGCGTAGAGATCGACTGCAGCGGCGAG  
GGGGCGGTGTTCTGTGGAGGCGGAGGCCGACGGCGAGATCGACGATTTAGGGGATTTCTCCCCAA  
ACCCTAACATCTGCCTCGCCCCCAAAGTCGACTATTCTCAAGGAATTTTCATCTTTCCCGCTGTTATTA  
GTTGAGGTTACCAGATTCAAATGCGGTGGAGTTTGCTTGGGCGTTGCGATGGACCATCAGGTGAAA  
GACGGAATTTCCGCTCTGCATATTATCCACACATGGTGCATATAGCCCCGCGGCCTCGACATCGCC  
GTGCCGCCGTACATGGACCGCCGTGTCTGGCGGCGCGTGAACCGCCGCAGCCTAAGTTCGAGC  
ACGTGCAATTCCATCCTCCGCCGCCGCTGAAAACTCAGAAGCTCACACAAATGGTTCGGAAACAA  
AATTTGCAGTACTGAAGCTAACGCGGGGAGCAGCTAATTATCCTCAAAGGCAACAGCCAAGAAGATG  
ATGGAAGAGGTCTCCTTACAGTTCATTGGAAGCGCTCACAGGGCATGTTTGGAGGTGCATCTGCA  
AAGCTCGTCGGCTACCGGAAGATCAAGAAACAAAGCTGACTATTATAGTGGACGGCCGATCGAGGC  
TGCGACCCCCGCTGCCACCCGGATACTTCGGCAATGCGGTGTTCAAAGCCACACACATCGCTTTGA  
GCCGTGAAGTCGAATCGAACCCGTTGAAATATGTGGTTTGCAAAGTTCGCGAGGCCTTGACCCGGA  
TGGACGACGAGTACTTGAGGTCCGCAATCGATTACTTGAGAGTCGAGGGCGGACTCGGCCCAAAT  
GCACGAGGCACCGGGCTTTACAAAAGCCCGAACCTCGGGATCACTAGTTGGGCCCGACTGCCCTT  
CTACGAAGCGGATTTTCGGATGGGGTAGGCCGTTTCACGTGGGGCTCGGCGCCGTTCCAGCCGAAG  
GGCATCTGATCGTGATGCCTAGTCCGACGAACGACGGCGGCTTGCGCCTGGCGATCGCGCTGCC  
GAGGAGCAGATGAAGATGTTGAGAAGATCTTCTACGAAATATGATGTTTCCCGAGCAAGTGTGCA  
CTAGTTAATTAAAGTTGATTTGCCAACTTTCTGATTATTAGATTAGATGTTTGCATTTTTGAATATATA  
GAACGTGGCGAGTATTATTAATAAAGTAAACAAATGTTACGTGCTAGTTGTGGGACAGTTTGCTT  
GATTTGTGAGACTTTTAATTCAAACAGTTTTTGGTGCCCCGGCTTCGCTCGGGTAATACTATCAGCT  
CTTTTTCTTCTTTGAATAATTTAATTTGTACATTAGTTGGTGTGTTCTTTATAATTTGTAAAATTAATA  
AGTTTTTCATA

>MIAT6

ATGAAGATCTTAATGAAGGAGTCCACGATGGTAAAGCCGATGGAGAAAACGCCGAGCGGCAGTGT  
GTGGCTCTCCAGTTTAGACTTAGTTTTTCCGGCCACCTACCATACTCGCTGGGTAAACTTCTACCGT  
TCCGACAGCGCCGCCAACTTTTTCGATACGGCGATGCTGAAGGCGGCGCTTAGCCGCACCTTGGT  
TGAGTTCTACCCTTATGCCGGGAGGCTGAGAAAGGACGATAACGGCCGCATCGAGATCAACTGCA  
GCAACGAAGGGGTACTATTCATAGAGGCGGAGTGCAACGGCGCCGTCAACGACTTGGGTGGTTTC  
AGCCCTATGCCCCGACATCAGCCTCGTACCCATAGTCGATTATTCTAACGGAATTTTCATCCTTCCCAC  
TTTTTCTAATACAGTTAACTCGGTTCAAATGCGGTGGAGTGAGCTTAGGTTTCGCAAACGAGCATCA  
CGTGTCAGATGGGGTCTCTGTTCTCCATTTCTGTCATCACGTGGTCGGAAATCGCTCGTGCCCTAAC  
TCCCGCCGTCCCTCCCTCCTTGGACCGCCGCCTCCTCTTCCCCCGAAACCCTCCGCGGCCGCGAGT  
TCCCCACATCGAGCACCGCCCCCTCCAACACTCAAACCCCTCTCGCCAACTCAGACACGTCAT  
TCTCATCATTGAGACTCACCCCCGTCCACATCAACGCCCTCAAACAAAAATGCAGACGCAACAGCG  
ACAGCGACAGTAGTCCGAGCTTTACCGGGTACGAGGTTGTCGCCGGCCACGTGTGGCGCTGCATC  
AGCATCGCCCGCGGGCTCCCGGTAGATCAGGAGACCAAGCTGCAGCTCCCGGTGCGACTCCCGGC  
GGAAGCTACGGCCGCCGCTCCCGCCGGGGTTCTTCGGCAATGGGATCTTCTACACCGGCGCGTTC  
ACTTCTGCGGCGAGCTGGCGTCTAAGCCGCTGAGGTTGCGGGTGGGGAAAGTGCGCGAGGCGA

TTGCCCCGGATGGACGACGAGTACTTGCGCTCGGCGGTGGATTACGTGGAGTTGAATATGGCGAAG  
GTGGAGGGCATCGTGCGCGCCGAAGGGCACGTGAGATGCCCCAACTTCGGGATCACGAGCTGGG  
TTCGGATGCCTGCGTACGAAGTGGACTTCGGGTGGGGGAAGCCGGTTTATGTGGGGCCAGGGGC  
AATTATGTCCGAAGGGAAAAGTTTTCTGATCGCTGATCCTCAAATGAGGGGGGCGTGCTGCTGCT  
TATCACGCTCCATAAACAGCACATGAAGGAATTTGAGAAGCTTCTCTATGCTGAGTTGCTCTTCCTC  
AAGAGTAATATT

>MIAT7

ATGAAGATCGATGTGAAAGAGTCGACGATGATAAAGCCGGCGGCGGAGACGCCGAGCGACAGCAT  
ATGGCTGTGAATCTGGACCTGCTATCGCCGGCGAACTACCACACACTGAGCGTCCACTTCTACCG  
CCACGACGGCTCAGCCAACTTCTTCGACGCGGCGACGTTGAAGGAAGCTCTCGGCCGCGCGCTGG  
TGGAGTTCTACCCGTACGCCGGTCGGCTGAAGCCGAACGGCAACCGCCTAGAGATCAACTGCAAC  
GGCGAGGGGGCTGCTGCTGGTGGAGGCGGAGTGCGACGGCGCCTTGGATGAGCTGGGGGACTTC  
GCCCCCGCCCCGATCTCAACCTTATCCCCAAAATTGATTATGCCAAGGGTATTTCCACGTACCCTC  
TCATCGTTTTTCAGGTAAATAAATCTATTTCTACTCCTTAATTTACTTTCCCTTCAAAGAAAGTTTTTA  
CTTTATTTTTTTTTATTATTTAA

**Information S2. The optimized sequences of *MIAT1*, *MIAT2*, *MIAT4* and *MIAT6*.**

>MIAT1

ATGAAAATCGAAGTGCGTGATAGCACACTGGTTCGTCCGAGCGCAGCAACACCTGCAGTTAGTCTG  
TGGAACAGCAATGTTGATCTGGTTGTGCCGAATTTTCATACCCCGAGCGTTTATTTTTATCGTCCTAA  
TAGCGCAGCAGAATTTTTTGATACCGCAGTTATGAAAGCAGCACTGGGTGCTGCGCTGGTGCCTTT  
TTATCCGATGGCAGGCCGTCTGAAACGTGATGAAGATGGTCGCATTGAAATCGATTGTAATGCAGA  
AGGTGTGCTGTTTGTGAAAGCCGAAAGTGATGGTACCGTTGATGATTATGGTGATTTTGCACCGACT  
CTGGAAGTGCCTGCTGATTCCGGCCGTTGATTATAGCCAGGGTATTAGTGCATATGCCCTGCTG  
GTGCTGCAGGTTACGTTTTTTAAATGTGGTGGTGTAGCCTGGGTGTTGGTATGCAGCATCATGTTG  
CCGATGGTTTTAGTGGTCTGCATTTTATTAACGCGTGAGCGATATGGCGCGTGGTCTGGATATTAC  
GCTGCCGCTTTTATTGATCGTACTCTGCTGCGTGCCCGTGATCCTCCTCAGCCTCAGTTTAAACAT  
GTTGAATATCAGCCGCCGCCGTCAATGAAAACCTATGATGCTACCGAAACCGTTGTTTCCATTTTTA  
AACTGACCCGTGAACAGCTGACTACCCTGAAAGCAAAAAGCAAAGATGATGGTAATACCGTTAATTA  
TAGCAGCTATGAAATGCTGAGCGGTCATGTTTGCGGTTGTGCCTGTCTGGCACGTGGTCTGCCTGA  
AGATCAGGATACCAAAGTGTATTTGCGACGGATGGTCGTAGCCGTCTGCAGCCTCCTCTGCCTCC  
TGGTTATTTTGGTAATGTGATTTTTACAGCCACCCCGTTGCAGTTGCAGGTGATCTGGAAAGCCGT  
CCGGTTTGGTATGGTGCTTCTAAAATTCATGATGCACTGGCACGTATGGATAATGAATATCTGCGCT  
CTGCCCTGGATTATCTGGAAGTGCAGCCGGATCTGAAAGCACTGGTTCGTGGTGGCGCATACCTTTC  
GTTGCCCGAACCTGGGTATTACTTCATGGGTTCTGCTGCCGATTCATGATGCCGATTTTGGTTGGG  
GTCGTCCGATTTTTATGGGTCCGGGTGGTATTGCATATGAAGGTCTGTCTTTGTTCTGCCGTCTCC  
GGCGAATGATGGTAGTCTGTCTGTTGCTATTAGTCTGCAGGCGGAACATATGAAAGTTTTTGAAAAA  
CTGCTGTATGAAATCTAA

>MIAT2

ATGAAAATCAGCGCAAAAAGAAAGCACCATGGTCCGTCCAACACAGAAACACCGGGTGGTAGCCTG  
TGGCTGAGTAACCTGGATCTGCTGATGCCGGCAAGCCATCATACCCGTACCGTTTATTTTTATGGTT  
GCGAAGGTGCAGCGAATTTTTTTGATACCGCAGTCCTGAAAGAAGCACTGGGTGCTGCACTGGTTG  
AATTTTATCCGTATGCAGGTGCGCTGCGTAAAGCAGGTGATGGTTCGTATTGAAATTGATTGTAATGG

TGAAGGTGTGCTGTTTGTGGAAGCGGAATGTGATGGTGCAATTGATGATCTGGGCGGCTTTGGTCC  
GCGTAGTCCTGATCTGACACTGGTTCCGAAAGTTGATTATAGCCAGGGTATTAGCACGTTTCCTCTG  
CTGCTGCTGCAGCTGACGCGTTTTAAATGTGGTGGTGTGTTGTCTGGGTGTTGCAAATGAACATCATA  
TTAGCGATGGTATTAGTGCACTGCATTTTATTAACACATGGTCTGATCTGTCTCGTGGTCTGACCAC  
CGCAGTGCCTCCTTTTCTGGATCGTCGTCTGCTGAGTTCCCGTCATCCGCCTCATCCTCAGTTTCCG  
CATACCGAACATCATCCTCCACCGCCTCTGAAAACCCCTCTGCTGATTTCAAGTTCTTATGCAACCC  
AGAGCACCTTTACCCTGACCCCTGATCATCTGAATCTGCTGAAACAGAAATGTGATCAGAACAAATC  
CGATCGTACCTATACCACCTATGAAGCAGTTGCCGGCCATGTTTGGCGCTGTGCAACAATTGCCCG  
TAGCCTGCCTCATGATCAGGAAACAAAACCTGCAGATCCCGGTAGATGCACGTACCCGTCTGCGTCC  
TCCACTGCCTCCTGGTTTTTTTTGGTAATGGTATTTTTTATACAAGTAGTACCGCACTGTGTGGTGAAC  
TGGCAAGCAAACCTCTGGAATTTGCCGTTGGTAAAGTTAATGCAGCACTGGTTAAATGGATGATGA  
ATATCTGCGTAGTGCACTGGATTATCTGGAACCTGCAGCTGCCGCGTATTTATGAAATGGCACGTTCT  
GAACGTAATGTTTCGTTGTCCGAATTTTGGTATTACCAGCTGGGTTTCGTCTGCCGTTTTATGAAGCAG  
ATTTTGGTTGGGGTAAACCGGTTTTATGCTGGTCCGGCGGCAGTTCAGTATGAAGGTAAAGTCTGC  
TGCTGGTTGATCGTGAAAACGAAGGTGGTCTGGTTCTGGTTATTACCCTGCTGAAACCGCATATGG  
AAGTTTTTGAAAACTGCTGTATGATATCTAA

>MIAT4

ATGTGCAGCATGAAAATTAGCGTTAAAAAGACCACCGTTGTTAAACCGATGGAAGAAACACCGAGC  
GGCGCACTGTGGCTGAGTAGTCTGGATCTGCTGCTGCCGGCAAGCTATCATAGCCGTACCGTCTAT  
TTTTTTCGTAGCGATGGCAGCCCTGGTTTTTTTGATGCAGCAGCCCTGATGGCAGCACTGAGTCGTA  
ATCTGGTTGAATTTTATCCGTTTGCAGGTCGTCTGCGTCGTGATGATAATGGTCGTCTGGAATTAA  
TTGTAATGGTGAAGGTGCGCTGTTTGTGGAAGCAGAATGTGATGGTACCCTGGATGATATGGGTGA  
TTTTAGCCCGCGTGCAAGATGTTAAATTTGTTCCGAAAGTTGATTATAGCCATGGTATTAGTAGCTTTC  
CGCTGTCTCTGATGCAGCTGACGCGTTTTAAATGTGGTGGTGTGTTGTCTGGGTGTTGTTACTGAACA  
TCATCTGGTTGATGGTATTGCGGCACTGCATTATATTAATACCTGGGCCCCGTATTGCCCTGGGTGAT  
CGTAATGCTGCAGCCGCAGATCCGCCTTTTCTGGATCGTCGTCTGCTGCTGAGTAGTCGTGTCCT  
CCTCAGCCTAAATTTCCGCATACAGAACATCAGCCTTTTCCGTCAGTAAAGCACCGCTGAATATTT  
CTGATGATACCTCTTTTAAAATCCTGGCCCTGACCGGTAATCATCTGACCGCACTGAAACAGGCCTG  
TAACGGCAAAAAGGATCGTAGTTATACCACCTATGAAGCAGCAGCAGGCCATGTTTGGCGCTGTGT  
TTGCATGGCTCGTGGTCTGCCTAGCGATCAGGAAAGCCGTCTGCAGCTGCCTGTGGATGGTTCGTA  
GTCGTCTGCGTCCTCCTCTGCCTCCTCGTTATTTTGGTAATGGTATTTTTTATACAACAAGTACCGTG  
ACCTGTGGTGAACCTGGCGAGCAATCCTCTGGAATATGCGGCAGGTAAAGTTCGTGAAGCAGTTGCA  
CGTATGGATGATGAATATCTGCGTAGTGCCGTTGATTATGTTGAAATGAAACTGCCGGAAAGCGATA  
GTATGGTGCGTAGCGATAAAAATGTAAATGCCCGAATTTTGGTATCACAAGCTGGGTGCGTCTGCC  
GTTTTATGAAGCAGATTTTGGTTGGGGTAAACCGGTTTATGCAGGTCCGGCGGCAGCTCTGTTTGA  
AGGTAAAAGTTTTTGGTTTGTGATCCGAAAAAGGAAGGTGATACACTGCTGGCCATTACCCTGCTG  
AAACCGCATATGGAACGTTTGA AAAACTGCTGTATGATTTTTAA

>MIAT6

ATGAAAATCCTGATGAAAGAAAGCACCATGGTTAAACCGATGGAAAAAACCCCGAGCGGTAGCGTT  
TGGCTGAGCAGCCTGGATCTGGTTTTTCCGGCAACCTATCATACCCGTTGGGTAAATTTTTATCGTA  
GCGATAGCGCAGCAAATTTTTTGTATCCGCAATGCTGAAAGCAGCACTGAGCCGTACCCTGGTTG  
AATTTTATCCGTATGCAGGTCGTCTGCGTAAAGATGATAATGGTCGTATTGAAATTAATTGTAGCAAT  
GAAGGTGTTCTGTTTATTGAAGCAGAATGTAATGGTGCAGTTAATGATCTGGGTGGTTTTAGCCCGA

TGCCGGATATTAGCCTGGTTCCGATTGTTGATTATAGCAATGGTATTAGCAGCTTTCCGCTGTTTCT  
GATTCAGCTGACCCGTTTTAAATGTGGTGGTGTAGCCTGGGTTTTGCAAATGAACATCATGTTAGC  
GATGGTGTAGCGTTCTGCATTTTGTATTACCTGGAGCGAAATTGCACGTGGTCTGACCCCGGCA  
GTTCCGCCGAGCCTGGATCGTCGTCTGCTGTTTCCGCGTAATCCGCCGCGTCCGCAGTTTCCGCAT  
ATTGAACATCGTCCGCCGCCGACCCTGAAAACCCCGCTGGCAAATAGCGATACCAGCTTTAGCAGC  
TTTCGTCTGACCCCGGTTTCATATTAATGCACTGAAACAGAAATGTCGTCTGTAATAGCGATAGCGATA  
GCAGCCCGAGCTTTACCGGTTATGAAGTTGTTGCAGGTCATGTTTGGCGTTGTATTAGCATTGCACG  
TGGTCTGCCGTTGATCAGGAAACCAAACCTGCAGCTGCCGGTTGATAGCCGTCGTAAACTGCGTCC  
GCCGCTGCCGCCGGGTTTTTTTTGGTAATGGTATTTTTATACCGGTGCATTTACCAGCTGTGGTGAA  
CTGGCAAGCAAACCGCTGCGTTTTGCAGTTGGTAAAGTTCGTGAAGCAATTGCACGTATGGATGAT  
GAATATCTGCGTAGCGCAGTTGATTATGTTGAACTGAATATGGCAAAGTTGAAGGTATTGTTCTGTG  
CAGAAGGTCATGTTCTGTTGTCCGAATTTTTGGTATTACCAGCTGGGTTCGTATGCCGGCATATGAAGT  
TGATTTTGGTTGGGGTAAACCGGTTTATGTTGGTCCGGGTGCAATTATGAGCGAAGGTAAAAGCTTT  
CTGATTGCAGATCCGCAGAATGAAGGTGGTGTCTGCTGCTGATTACCCTGCATAAACAGCATATGA  
AGAATTTGAAAACTGCTGTATGCAGAACTGCTGTTTCTGAAAAGCAATATT

**Information S3. The nucleotide sequences of *MIAT6* mutants.**

>*MIAT6* R355A

ATGAAAATCCTGATGAAAGAAAGCACCATGGTTAAACCGATGGAAAAACCCCGAGCGGTAGCGTT  
TGGCTGAGCAGCCTGGATCTGGTTTTTCCGGCAACCTATCATACCCGTTGGGTAAATTTTTATCGTA  
GCGATAGCGCAGCAAATTTTTTGTATACCGCAATGCTGAAAGCAGCACTGAGCCGTACCCTGGTTG  
AATTTTATCCGTATGCAGGTCGTCTGCGTAAAGATGATAATGGTCGTATTGAAATTAATTGTAGCAAT  
GAAGGTGTTCTGTTTATTGAAGCAGAATGTAATGGTGCAGTTAATGATCTGGGTGGTTTTAGCCCGA  
TGCCGGATATTAGCCTGGTTCCGATTGTTGATTATAGCAATGGTATTAGCAGCTTTCCGCTGTTTCT  
GATTCAGCTGACCCGTTTTAAATGTGGTGGTGTAGCCTGGGTTTTGCAAATGAACATCATGTTAGC  
GATGGTGTAGCGTTCTGCATTTTGTATTACCTGGAGCGAAATTGCACGTGGTCTGACCCCGGCA  
GTTCCGCCGAGCCTGGATCGTCGTCTGCTGTTTCCGCGTAATCCGCCGCGTCCGCAGTTTCCGCAT  
ATTGAACATCGTCCGCCGCCGACCCTGAAAACCCCGCTGGCAAATAGCGATACCAGCTTTAGCAGC  
TTTCGTCTGACCCCGGTTTCATATTAATGCACTGAAACAGAAATGTCGTCTGTAATAGCGATAGCGATA  
GCAGCCCGAGCTTTACCGGTTATGAAGTTGTTGCAGGTCATGTTTGGCGTTGTATTAGCATTGCACG  
TGGTCTGCCGTTGATCAGGAAACCAAACCTGCAGCTGCCGGTTGATAGCCGTCGTAAACTGCGTCC  
GCCGCTGCCGCCGGGTTTTTTTTGGTAATGGTATTTTTATACCGGTGCATTTACCAGCTGTGGTGAA  
CTGGCAAGCAAACCGCTGCGTTTTGCAGTTGGTAAAGTTCGTGAAGCAATTGCACGTATGGATGAT  
GAATATCTGCGTAGCGCAGTTGATTATGTTGAACTGAATATGGCAAAGTTGAAGGTATTGTTGCAG  
CAGAAGGTCATGTTCTGTTGTCCGAATTTTTGGTATTACCAGCTGGGTTCGTATGCCGGCATATGAAGT  
TGATTTTGGTTGGGGTAAACCGGTTTATGTTGGTCCGGGTGCAATTATGAGCGAAGGTAAAAGCTTT  
CTGATTGCAGATCCGCAGAATGAAGGTGGTGTCTGCTGCTGATTACCCTGCATAAACAGCATATGA  
AGAATTTGAAAACTGCTGTATGCAGAACTGCTGTTTCTGAAAAGCAATATTAA

>*MIAT6* K398L

ATGAAAATCCTGATGAAAGAAAGCACCATGGTTAAACCGATGGAAAAACCCCGAGCGGTAGCGTT  
TGGCTGAGCAGCCTGGATCTGGTTTTTCCGGCAACCTATCATACCCGTTGGGTAAATTTTTATCGTA  
GCGATAGCGCAGCAAATTTTTTGTATACCGCAATGCTGAAAGCAGCACTGAGCCGTACCCTGGTTG  
AATTTTATCCGTATGCAGGTCGTCTGCGTAAAGATGATAATGGTCGTATTGAAATTAATTGTAGCAAT

GAAGGTGTTCTGTTTATTGAAGCAGAATGTAATGGTGCAGTTAATGATCTGGGTGGTTTTAGCCCGA  
TGCCGGATATTAGCCTGGTTCCGATTGTTGATTATAGCAATGGTATTAGCAGCTTTCCGCTGTTTCT  
GATTCAGCTGACCCGTTTTAAATGTGGTGGTGTAGCCTGGGTTTTGCAAATGAACATCATGTTAGC  
GATGGTGTAGCGTTCTGCATTTTGTATTACCTGGAGCGAAATTGCACGTGGTCTGACCCCGGCA  
GTTCCGCCGAGCCTGGATCGTCGTCTGCTGTTTCCGCGTAATCCGCCGCGTCCGCAGTTTCCGCAT  
ATTGAACATCGTCCGCCGCCGACCCTGAAAACCCCGCTGGCAAATAGCGATACCAGCTTTAGCAGC  
TTTCGTCTGACCCCGGTTTCATATTAATGCACTGAAACAGAAATGTCGTCTGTAATAGCGATAGCGATA  
GCAGCCCGAGCTTTACCGGTTATGAAGTTGTTGCAGGTCATGTTTGGCGTTGTATTAGCATTGCACG  
TGGTCTGCCGGTTGATCAGGAAACCAAACCTGCAGCTGCCGGTTGATAGCCGTCGTAAACTGCGTCC  
GCCGCTGCCGCCGGGTTTTTTTTGGTAATGGTATTTTTTATACCGGTGCATTTACCAGCTGTGGTGAA  
CTGGCAAGCAAACCGCTGCGTTTTGCAGTTGGTAAAGTTCGTGAAGCAATTGCACGTATGGATGAT  
GAATATCTGCGTAGCGCAGTTGATTATGTTGAACTGAATATGGCAAAAGTTGAAGGTATTGTTCTG  
CAGAAGGTCATGTTCTGTTGTCCGAATTTTGGTATTACCAGCTGGGTTCGTATGCCGGCATATGAAGT  
TGATTTTGGTTGGGGTAAACCGGTTTATGTTGGTCCGGGTGCAATTATGAGCGAAGGTCTAGCTTT  
CTGATTGCAGATCCGCAGAATGAAGGTGGTGTCTGCTGCTGATTACCCTGCATAAACAGCATATGA  
AAGAATTTGAAAACTGCTGTATGCAGAACTGCTGTTTCTGAAAAGCAATATTTAA

>MIAT6 R355A+K398L

ATGAAAATCCTGATGAAAGAAAGCACCATGGTTAAACCGATGGAAAAAACCCCGAGCGGTAGCGTT  
TGGCTGAGCAGCCTGGATCTGGTTTTTCCGGCAACCTATCATACCCGTTGGGTAAATTTTTATCGTA  
GCGATAGCGCAGCAAATTTTTTATACCGCAATGCTGAAAGCAGCACTGAGCCGTACCCTGGTTG  
AATTTTATCCGTATGCAGGTCGTCTGCGTAAAGATGATAATGGTCGTATTGAAATTAATTGTAGCAAT  
GAAGGTGTTCTGTTTATTGAAGCAGAATGTAATGGTGCAGTTAATGATCTGGGTGGTTTTAGCCCGA  
TGCCGGATATTAGCCTGGTTCCGATTGTTGATTATAGCAATGGTATTAGCAGCTTTCCGCTGTTTCT  
GATTCAGCTGACCCGTTTTAAATGTGGTGGTGTAGCCTGGGTTTTGCAAATGAACATCATGTTAGC  
GATGGTGTAGCGTTCTGCATTTTGTATTACCTGGAGCGAAATTGCACGTGGTCTGACCCCGGCA  
GTTCCGCCGAGCCTGGATCGTCGTCTGCTGTTTCCGCGTAATCCGCCGCGTCCGCAGTTTCCGCAT  
ATTGAACATCGTCCGCCGCCGACCCTGAAAACCCCGCTGGCAAATAGCGATACCAGCTTTAGCAGC  
TTTCGTCTGACCCCGGTTTCATATTAATGCACTGAAACAGAAATGTCGTCTGTAATAGCGATAGCGATA  
GCAGCCCGAGCTTTACCGGTTATGAAGTTGTTGCAGGTCATGTTTGGCGTTGTATTAGCATTGCACG  
TGGTCTGCCGGTTGATCAGGAAACCAAACCTGCAGCTGCCGGTTGATAGCCGTCGTAAACTGCGTCC  
GCCGCTGCCGCCGGGTTTTTTTTGGTAATGGTATTTTTTATACCGGTGCATTTACCAGCTGTGGTGAA  
CTGGCAAGCAAACCGCTGCGTTTTGCAGTTGGTAAAGTTCGTGAAGCAATTGCACGTATGGATGAT  
GAATATCTGCGTAGCGCAGTTGATTATGTTGAACTGAATATGGCAAAAGTTGAAGGTATTGTTGCAG  
CAGAAGGTCATGTTCTGTTGTCCGAATTTTGGTATTACCAGCTGGGTTCGTATGCCGGCATATGAAGT  
TGATTTTGGTTGGGGTAAACCGGTTTATGTTGGTCCGGGTGCAATTATGAGCGAAGGTCTAGCTTT  
CTGATTGCAGATCCGCAGAATGAAGGTGGTGTCTGCTGCTGATTACCCTGCATAAACAGCATATGA  
AAGAATTTGAAAACTGCTGTATGCAGAACTGCTGTTTCTGAAAAGCAATATTTAA
